# Supplementary material for: A novel example of double reactivity by either photochemical [2+2] or thermal additions of an ionic organic supramolecular assembly
Source: Royal Society of Chemistry journal article supplement (doi:10.1039/c5nj00678c), 2015-01-01

## Supplementary Material

---

### A novel example of double reactivity by either photochemical [2+2] or thermal additions of an ionic organic supramolecular assembly

---

Alexander Briceño,<sup>a\*</sup> Dayana Leal,<sup>a,b</sup> and Graciela Diaz de Delgado,<sup>b</sup>

<sup>a</sup> Instituto Venezolano de Investigaciones Científicas, (IVIC), Apartado 21827, Caracas, 1020-A, Venezuela. Laboratorio de Síntesis y Caracterización de Nuevos Materiales, Centro de Química. <sup>b</sup> Universidad de Los Andes (ULA), Facultad de Ciencias, Departamento de Química, Laboratorio de Cristalografía, Apartado 40, La Hechicera, Mérida 5251, Venezuela.

\*Corresponding author: Alexander Briceño; [abriceno@ivic.gob.ve](mailto:abriceno@ivic.gob.ve)

#### 1. List of Figures

**Figure S1.** (a) Monitoring the photoreaction of **1** by FT-IR at different UV-irradiation time periods. (b) Comparison of the FT-IR spectra of **1** before and after the photoreaction for 24 h, respectively.

**Figure S2.** (a) Comparison of the <sup>1</sup>H NMR spectra in DMSO-D<sub>6</sub> obtained from the photoreaction of compound **1** after irradiation for 48 h and the mixture after a second grinding-irradiation step (additional UV-irradiation for 1 day).

**Figure S3.** (a) Monitoring structural changes of the photoreaction of **1** by Powder X-Ray Diffraction at different UV-irradiation time periods.

**Figure S4.** Thermal analyses TGA/DSC of **1** heated at 190 °C for 30 min and cool down at 100 °C and heated until 600 °C.

**Figure S5.** FT-IR spectrum of **1** fresh heated in the solid state upon nitrogen atmosphere at 190 °C for 30 min

**Figure S6.** Comparison of the <sup>1</sup>H NMR spectra of compound **1** in DMSO-D<sub>6</sub> after UV irradiation for 2 days at 254 nm and after heating under hydrothermal conditions at 140 and 190 °C for 2 days, showing the isomerisation of *rectt* to *rtct*-isomer. (b) The <sup>1</sup>H NMR spectrum of [(*rectt*-H<sub>2</sub>Cbtc<sup>2-</sup>)(Im<sup>+</sup>)<sub>2</sub>]: (**2**) in DMSO-D<sub>6</sub> after heating under hydrothermal conditions at 120 °C for 2 days.

**Figure S7.** The <sup>1</sup>H NMR spectrum of compound **1** in DMSO-D<sub>6</sub> after UV irradiation for 2 days at 254 nm and heated under hydrothermal conditions at 120 °C for 2 days, showing the isomerisation of *rectt* to *rectt* and *rtct*-isomers together with the products of the thermal ring cleavage (Maleic and Fumaric acid) and traces of hydroamination product.

**Figure S1. Figure S1.** (a) Monitoring the photoreaction of **1** by FT-IR at different UV-irradiation time periods. (b) Comparison of the FT-IR spectra of **1** before (blue) and after the photoreaction for 24 h (red), respectively.

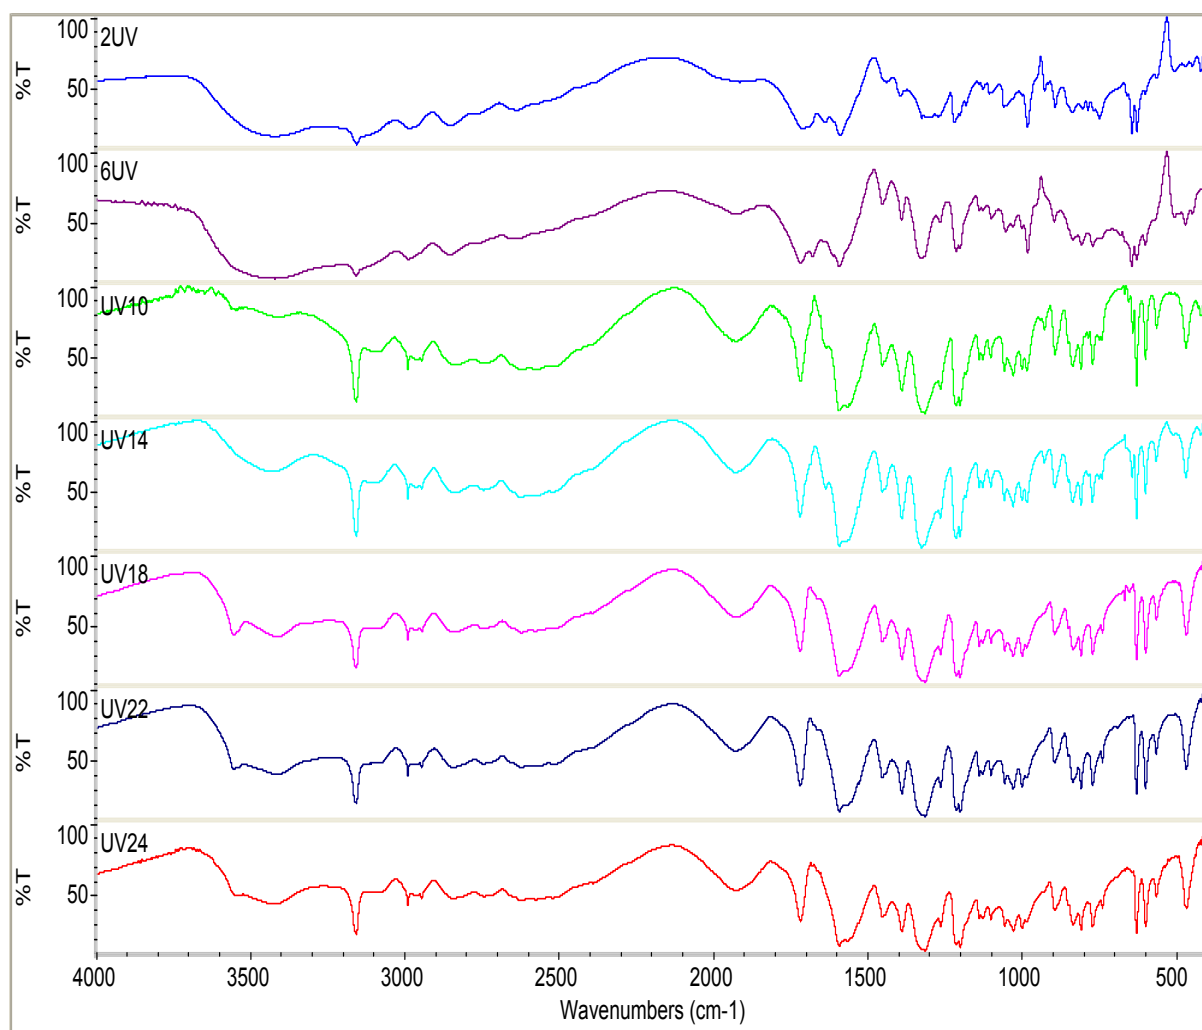

**(a)**

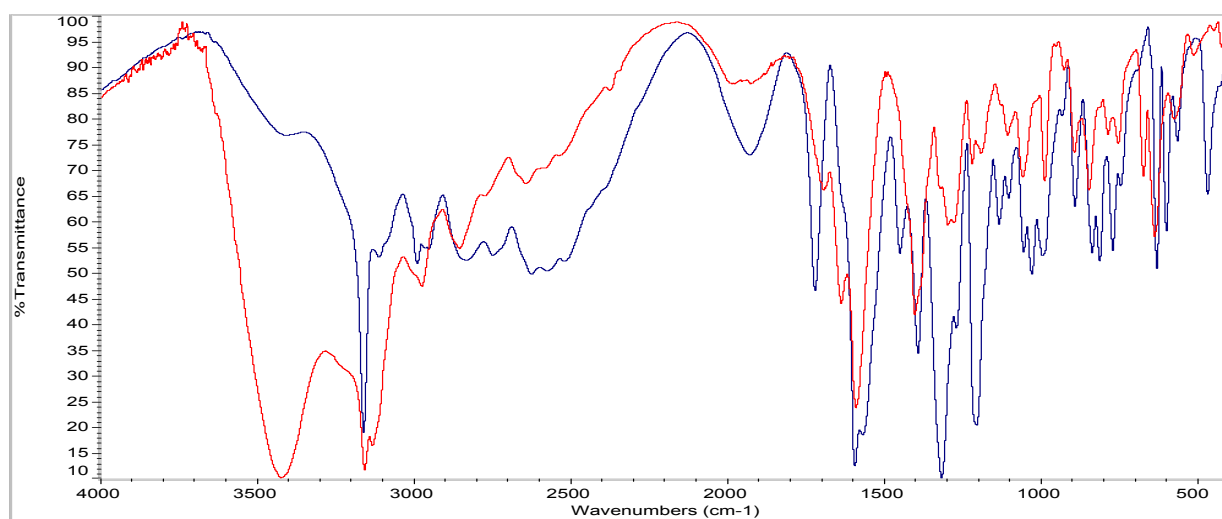

**(b)**

**Figure S2.** Comparison of the  $^1\text{H}$  NMR spectra obtained from the photoreaction of compound **1** after irradiation for 48 h and the mixture after a second grinding-irradiation step (additional UV-irradiation for 1 day).

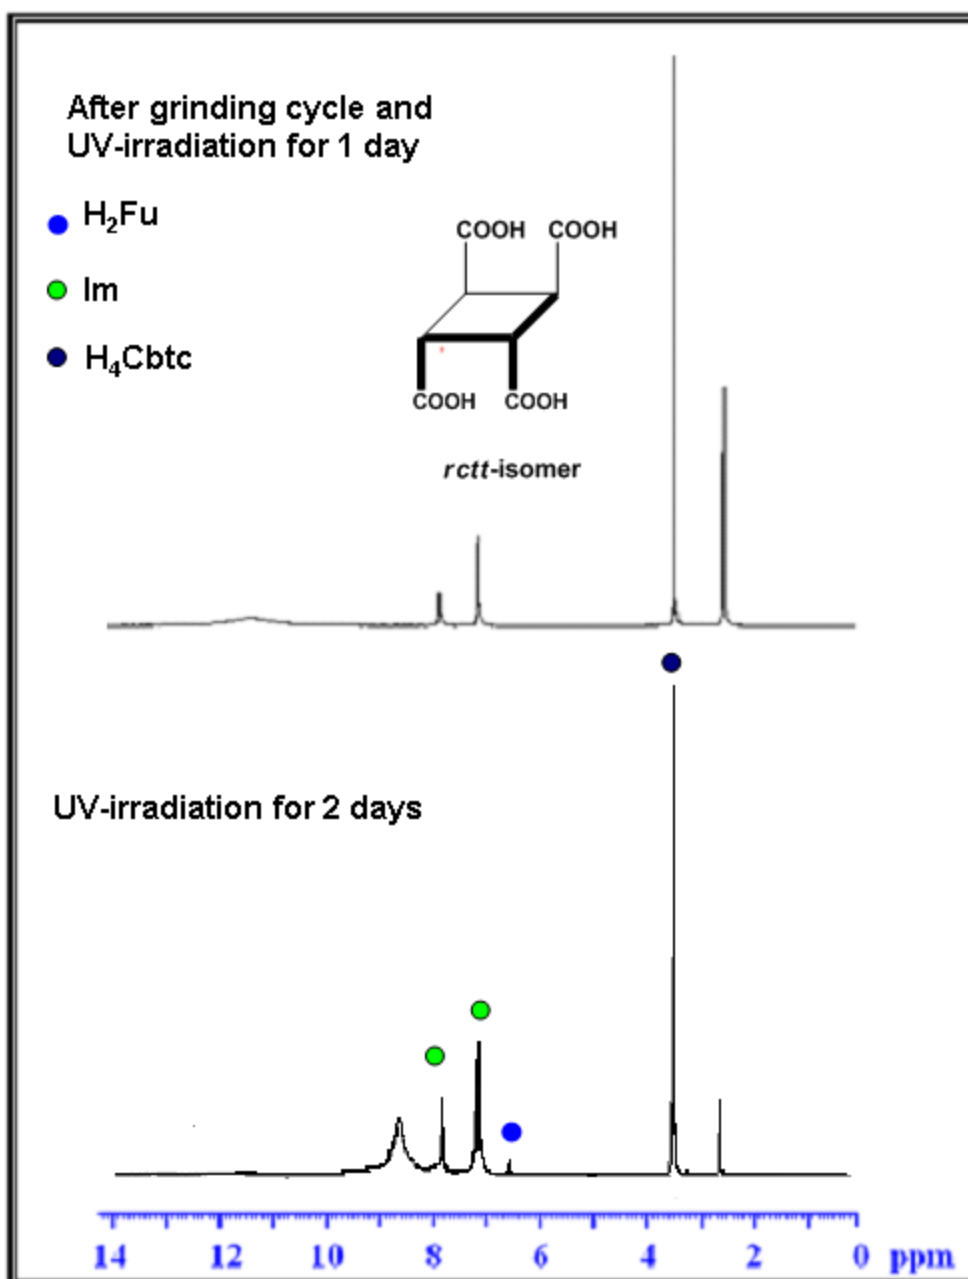

**Figure S3.** (a) Monitoring structural changes of the photoreaction of **1** by X-Ray Powder Diffraction at different UV-irradiation time periods.

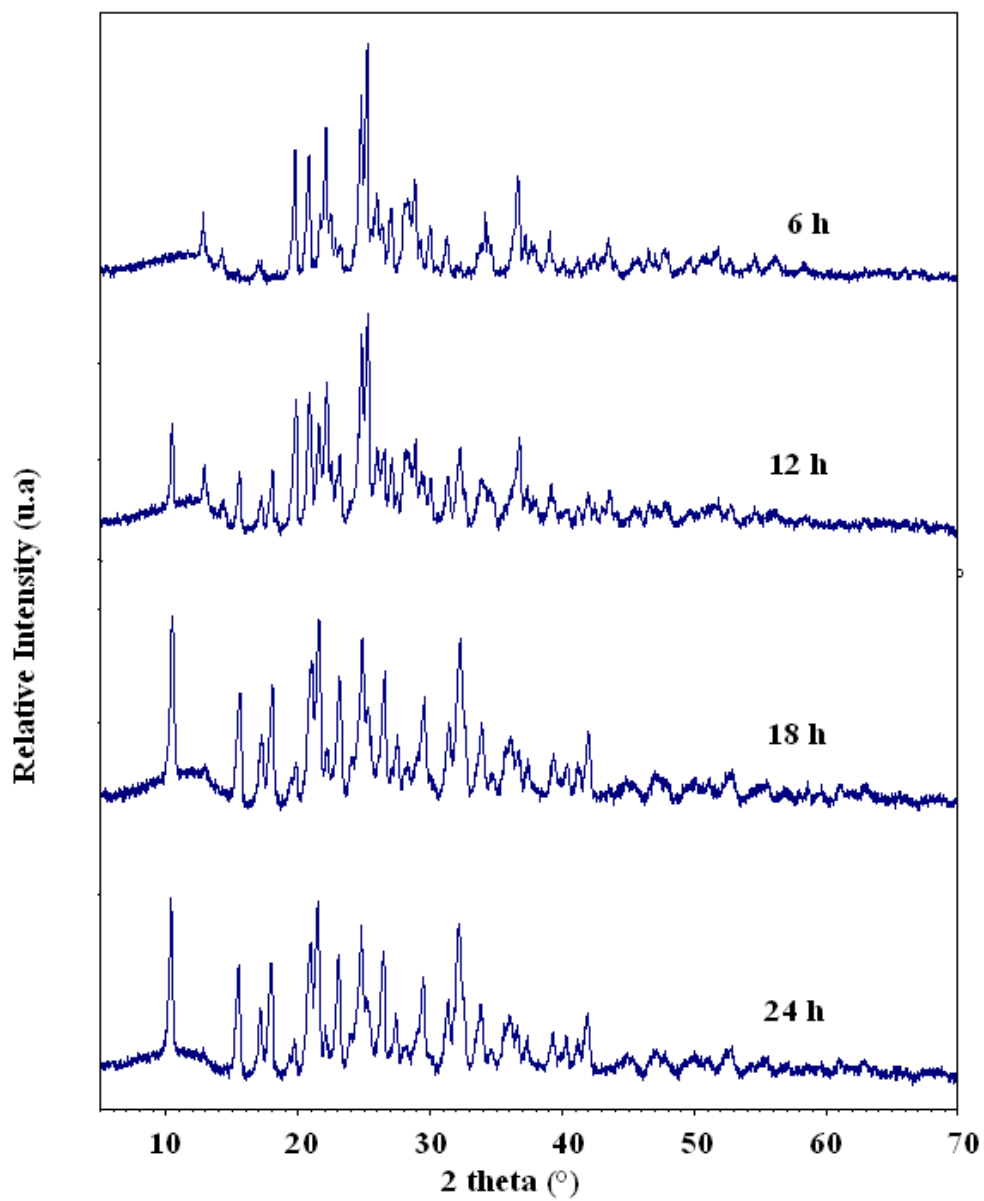

**Figure S4.** Thermal analyses TGA/DSC of **1** heated at 190 °C for 30 min and cool down at 100 °C and heated until 600 °C.

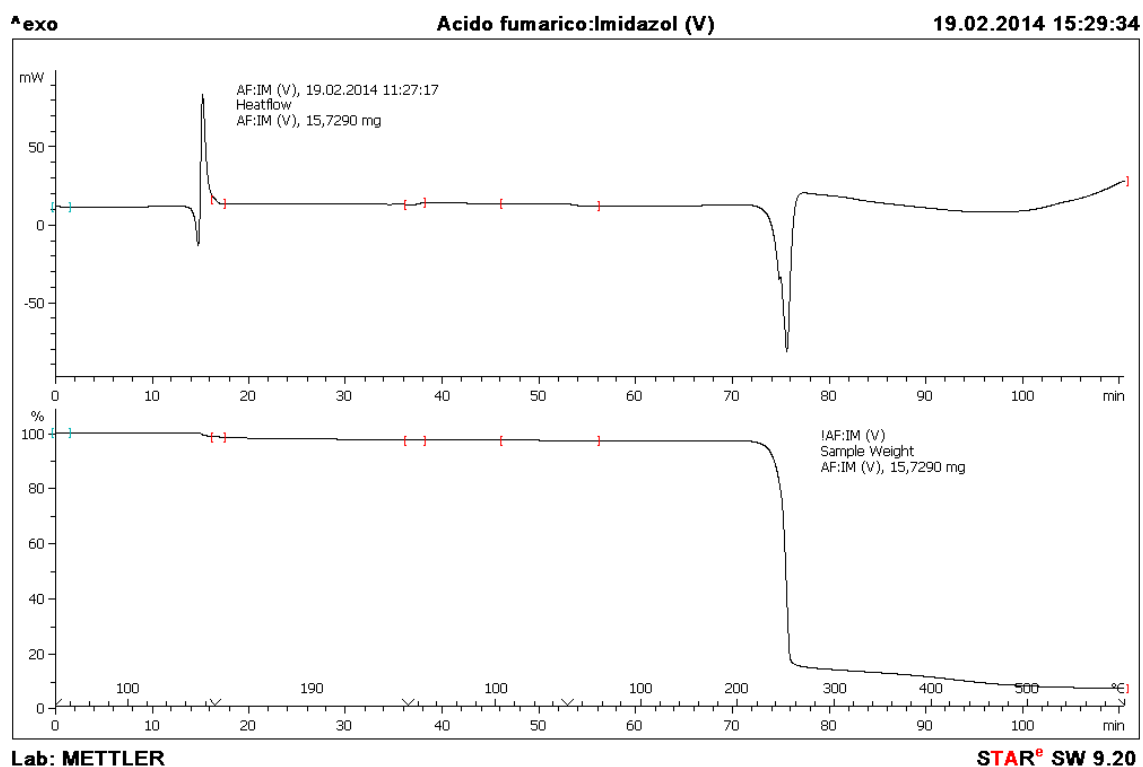

**Figure S5.** FT-IR spectrum of **1** fresh heated in the solid state upon nitrogen atmosphere at 190 °C for 30 min

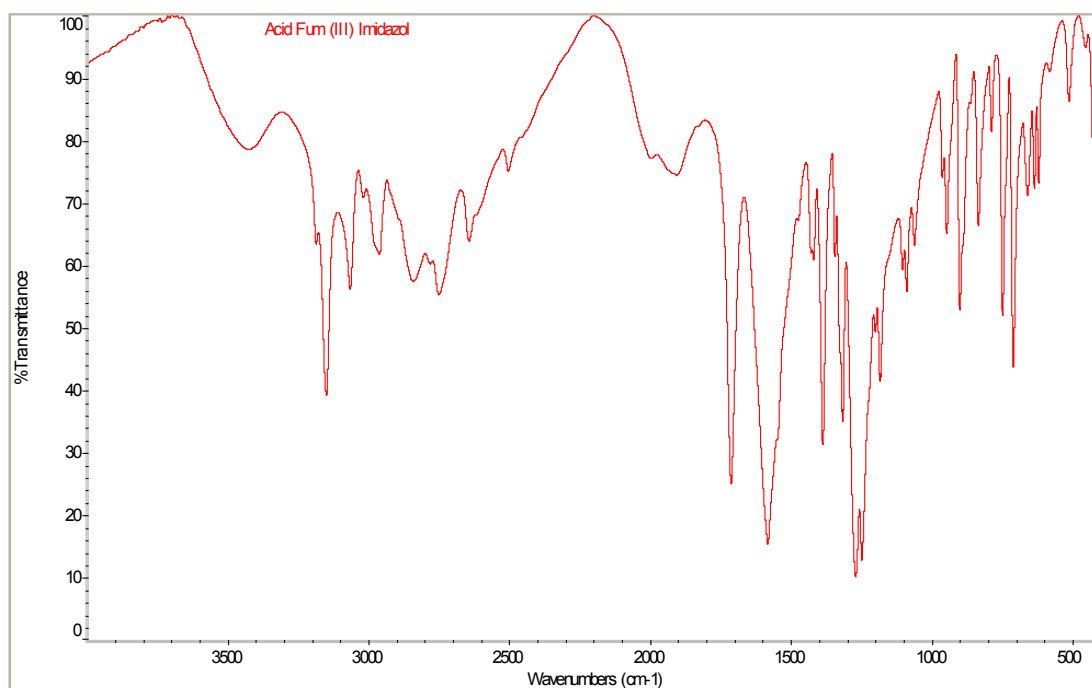

**Figure S6. (a)** Comparison of the  $^1\text{H}$  NMR spectra of compound **1** in DMSO after UV irradiation for 2 days at 254 nm and after heating under hydrothermal conditions at 140 and 190  $^\circ\text{C}$  for 2 days, showing the isomerisation of *rtct* to *rtct*-isomer. (b)

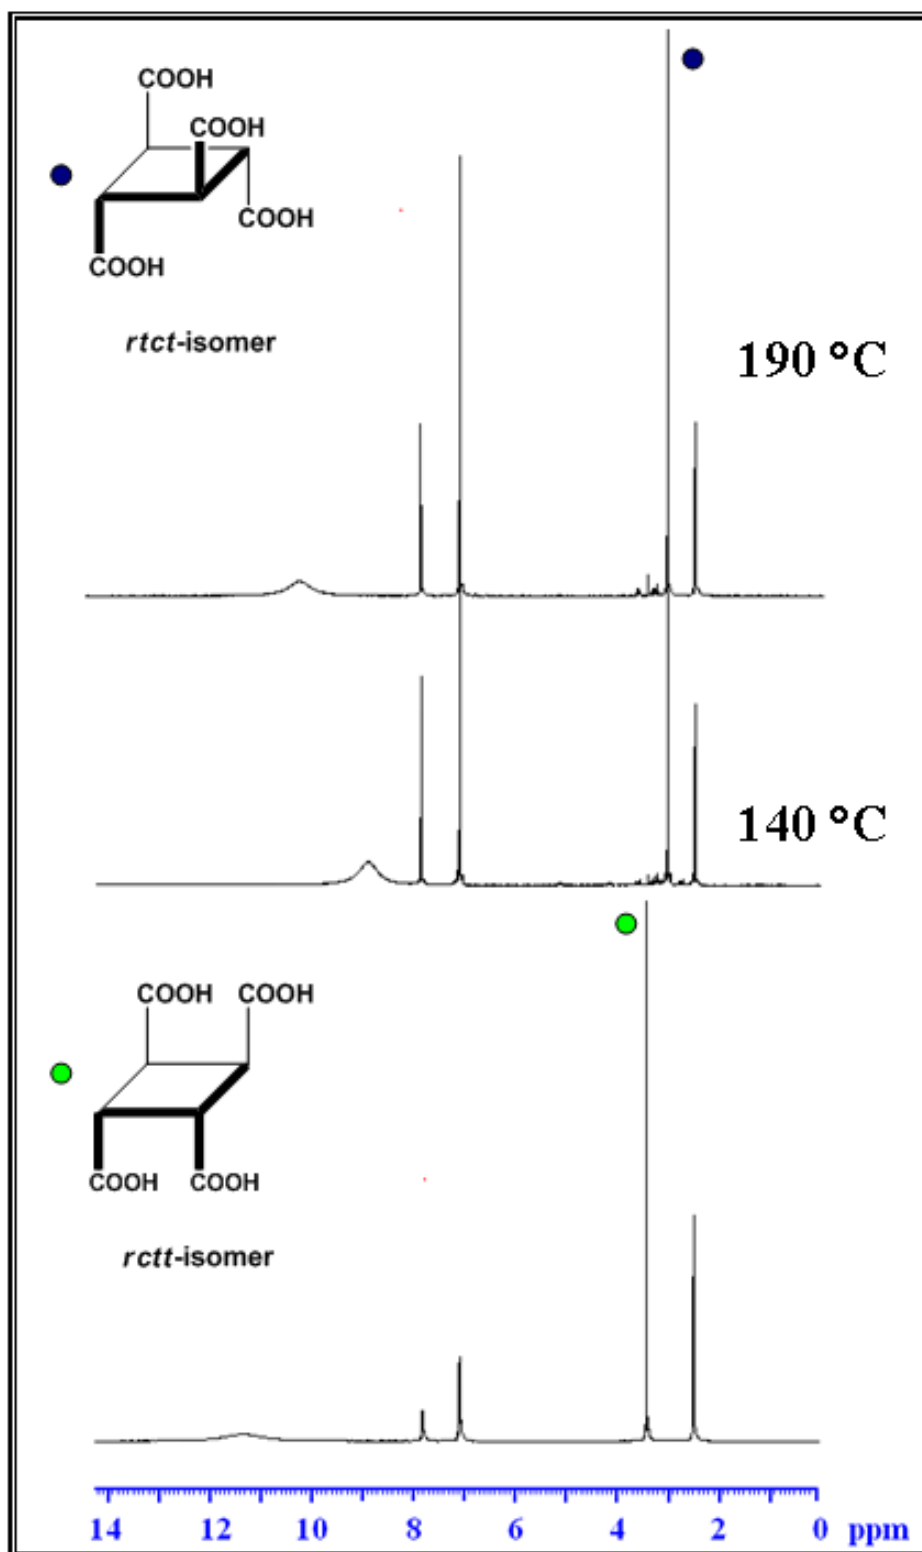

**Figure S7.** The  $^1\text{H}$  NMR spectrum of compound **1** in  $\text{DMSO-}D_6$  after UV irradiation for 2 days at 254 nm and heated under hydrothermal conditions at 120 °C for 2 days, showing the isomerisation of *rttt* to *rcct* and *rtct*-isomers together with the products of the thermal ring cleavage (Maleic and Fumaric acid) and traces of hydroamination product.

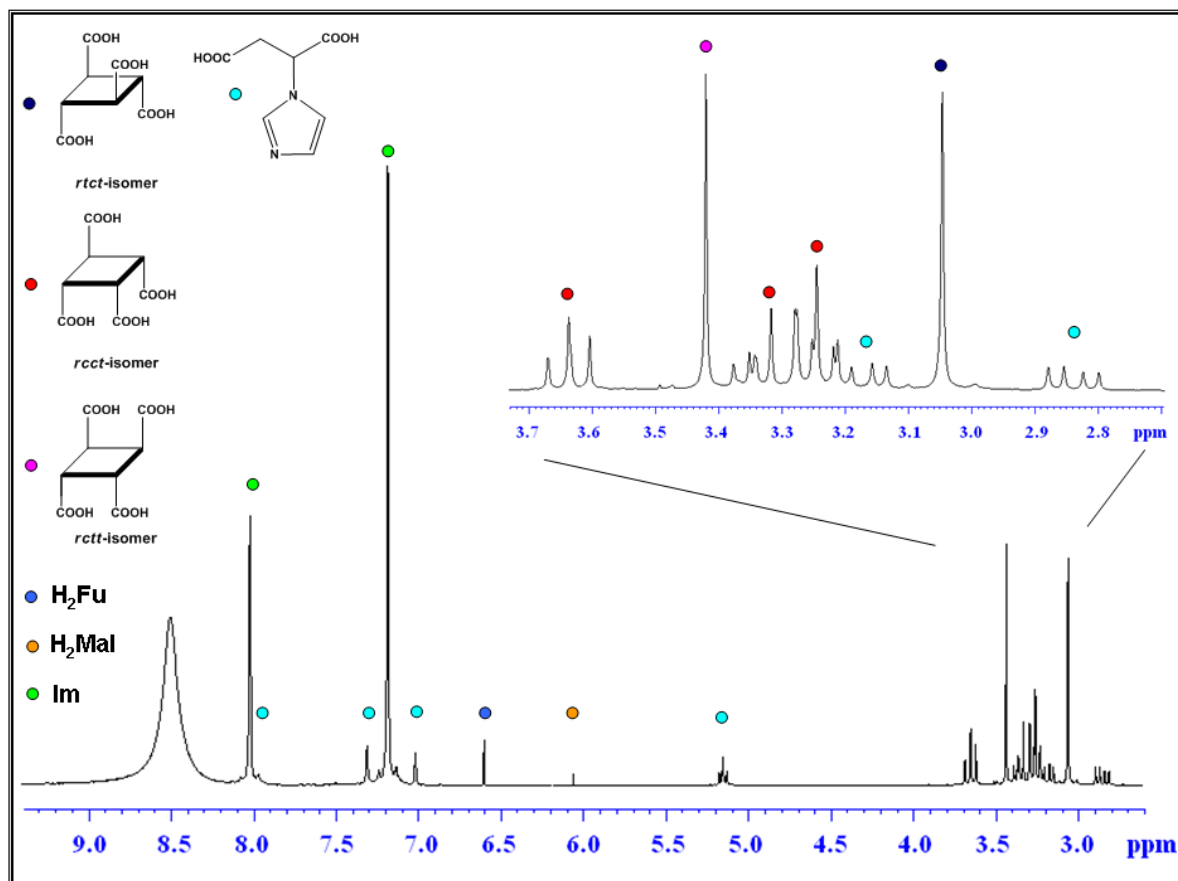

Supplement: c5nj00678c1.pdf [file c5nj00678c1.pdf]
